# Supplementary material for: High-resolution imaging mass spectrometry combined with transcriptomic analysis identified a link between fatty acid composition of phosphatidylinositols and the immune checkpoint pathway at the primary tumour site of breast cancer
Source: PubMed Central journal article supplement (PMC7051979; doi:10.1038/s41416-019-0662-8), 2019-12-10
Supplement: 41416_2019_662_MOESM5_ESM.pdf [file 41416_2019_662_MOESM5_ESM.pdf]

**Fig. S5**

**a**

**Free fatty acids in culture media**

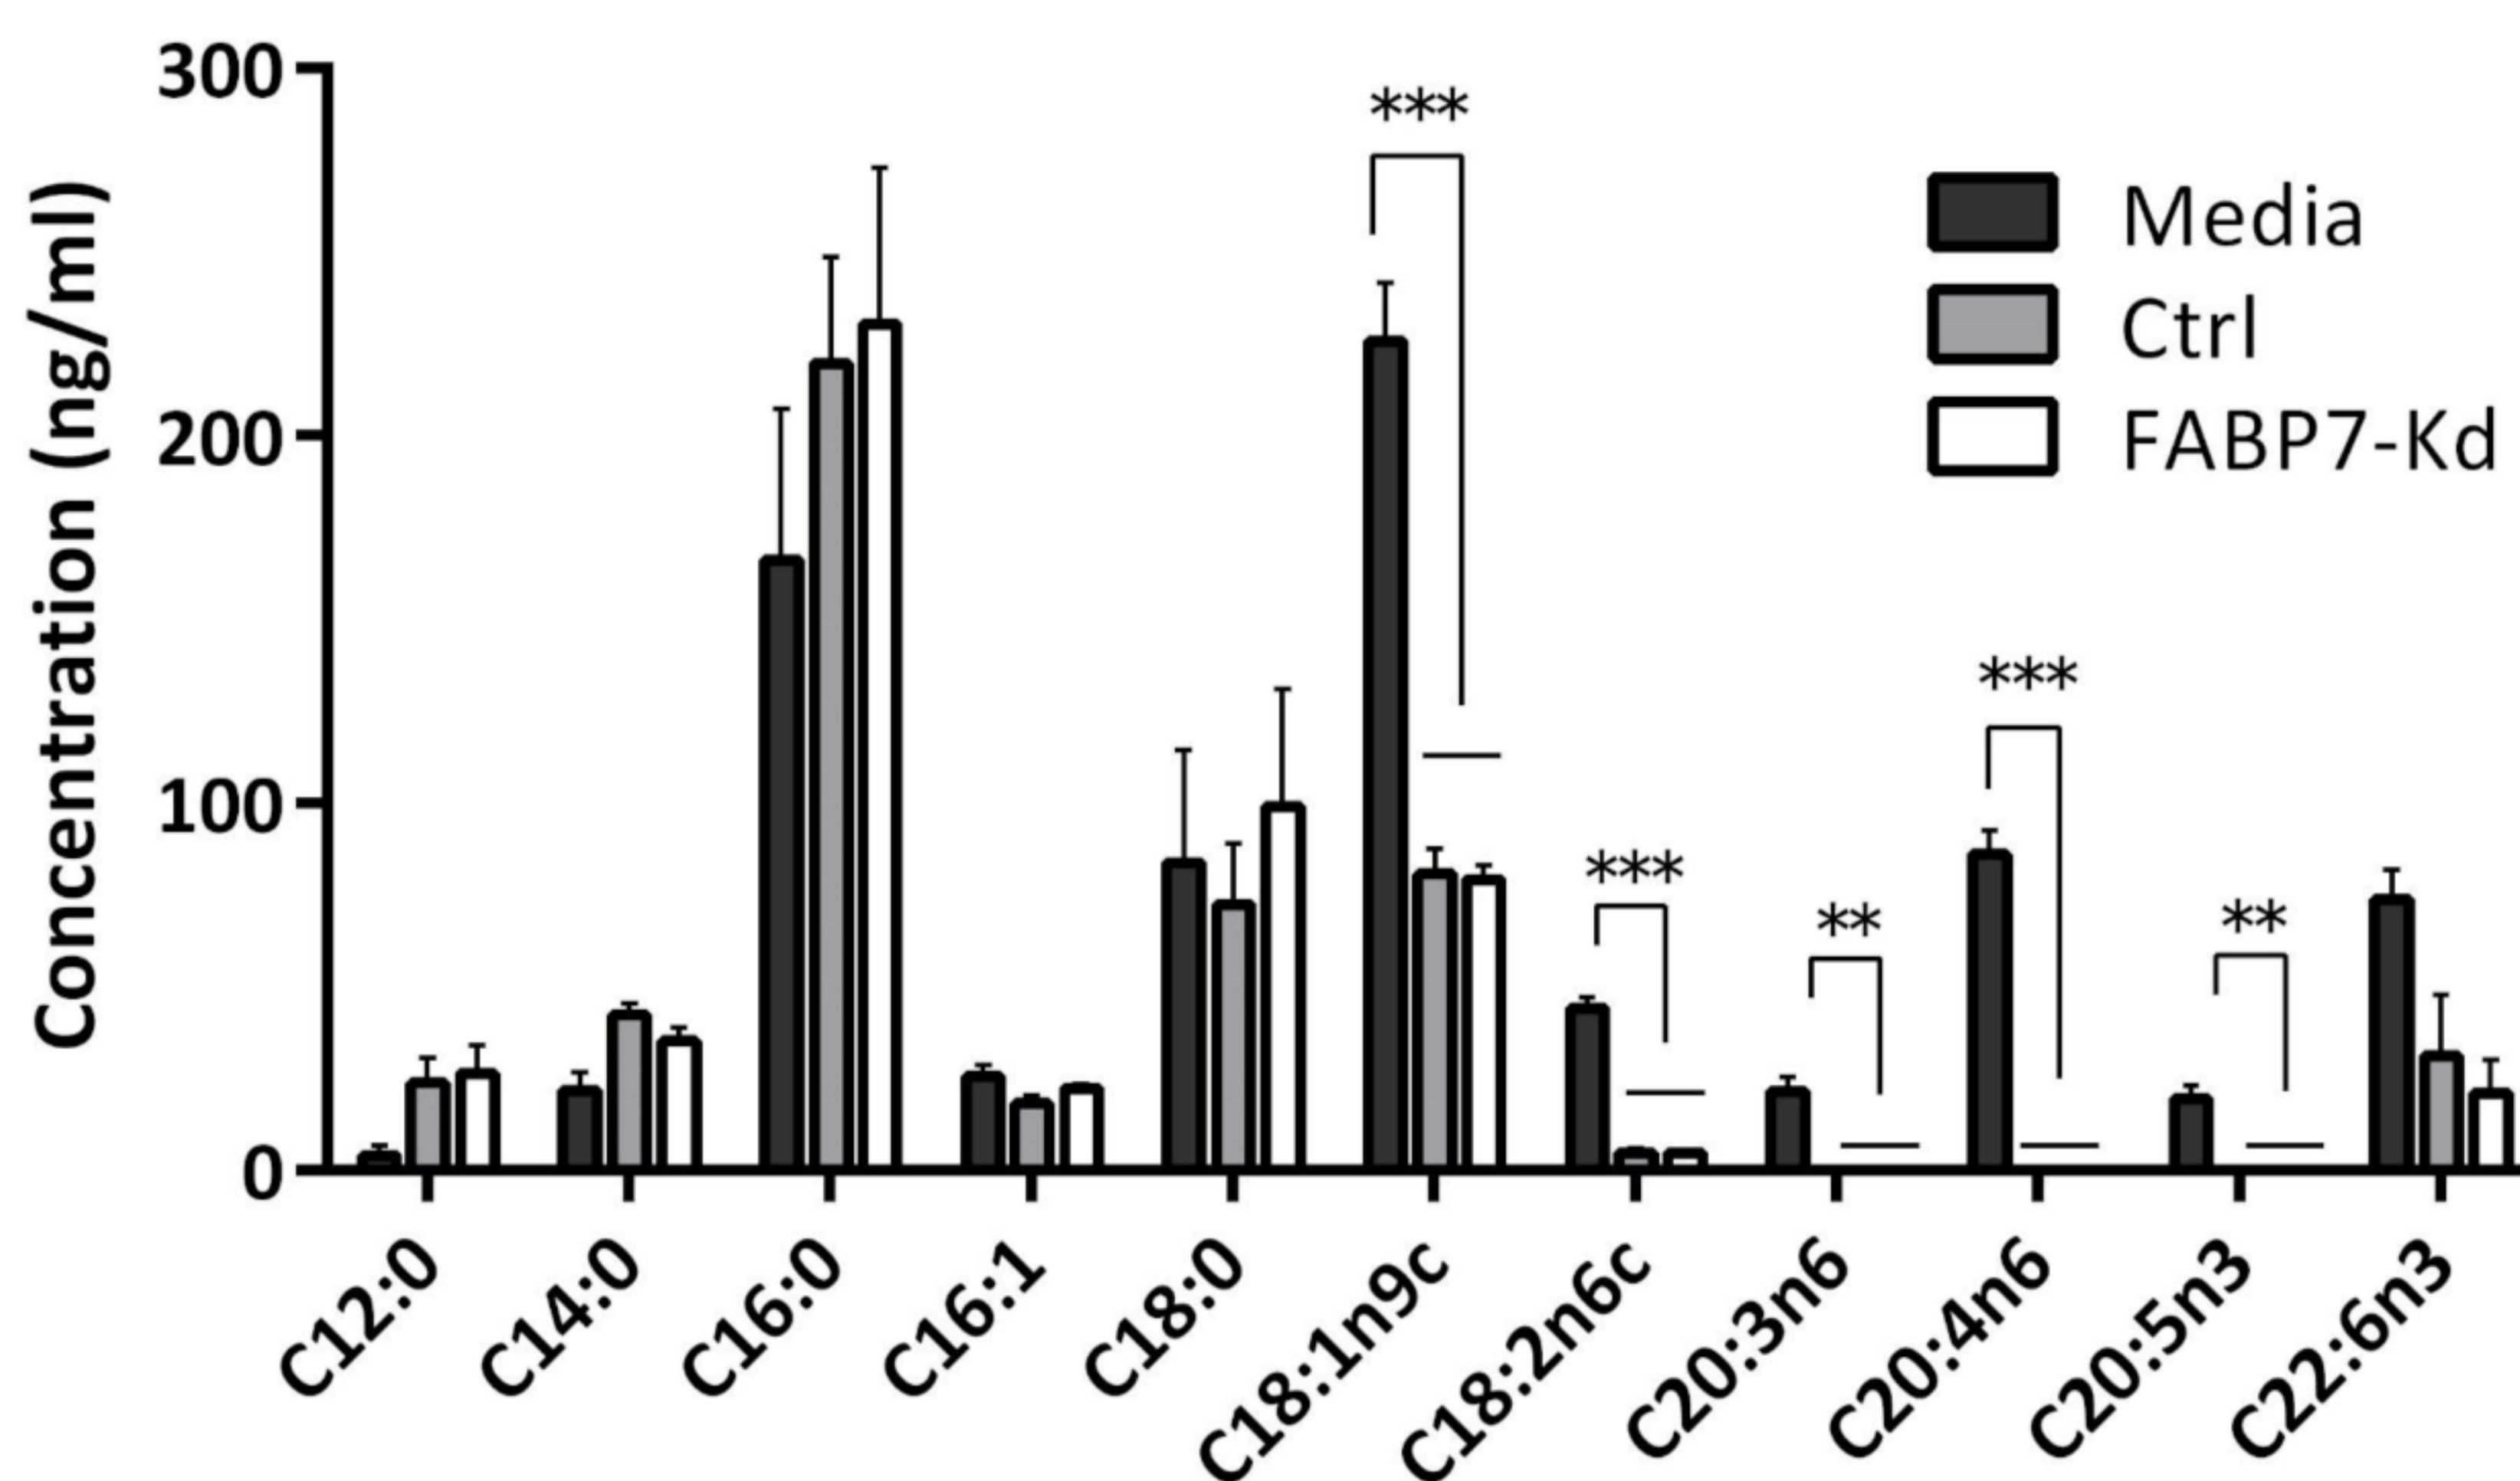

**b**

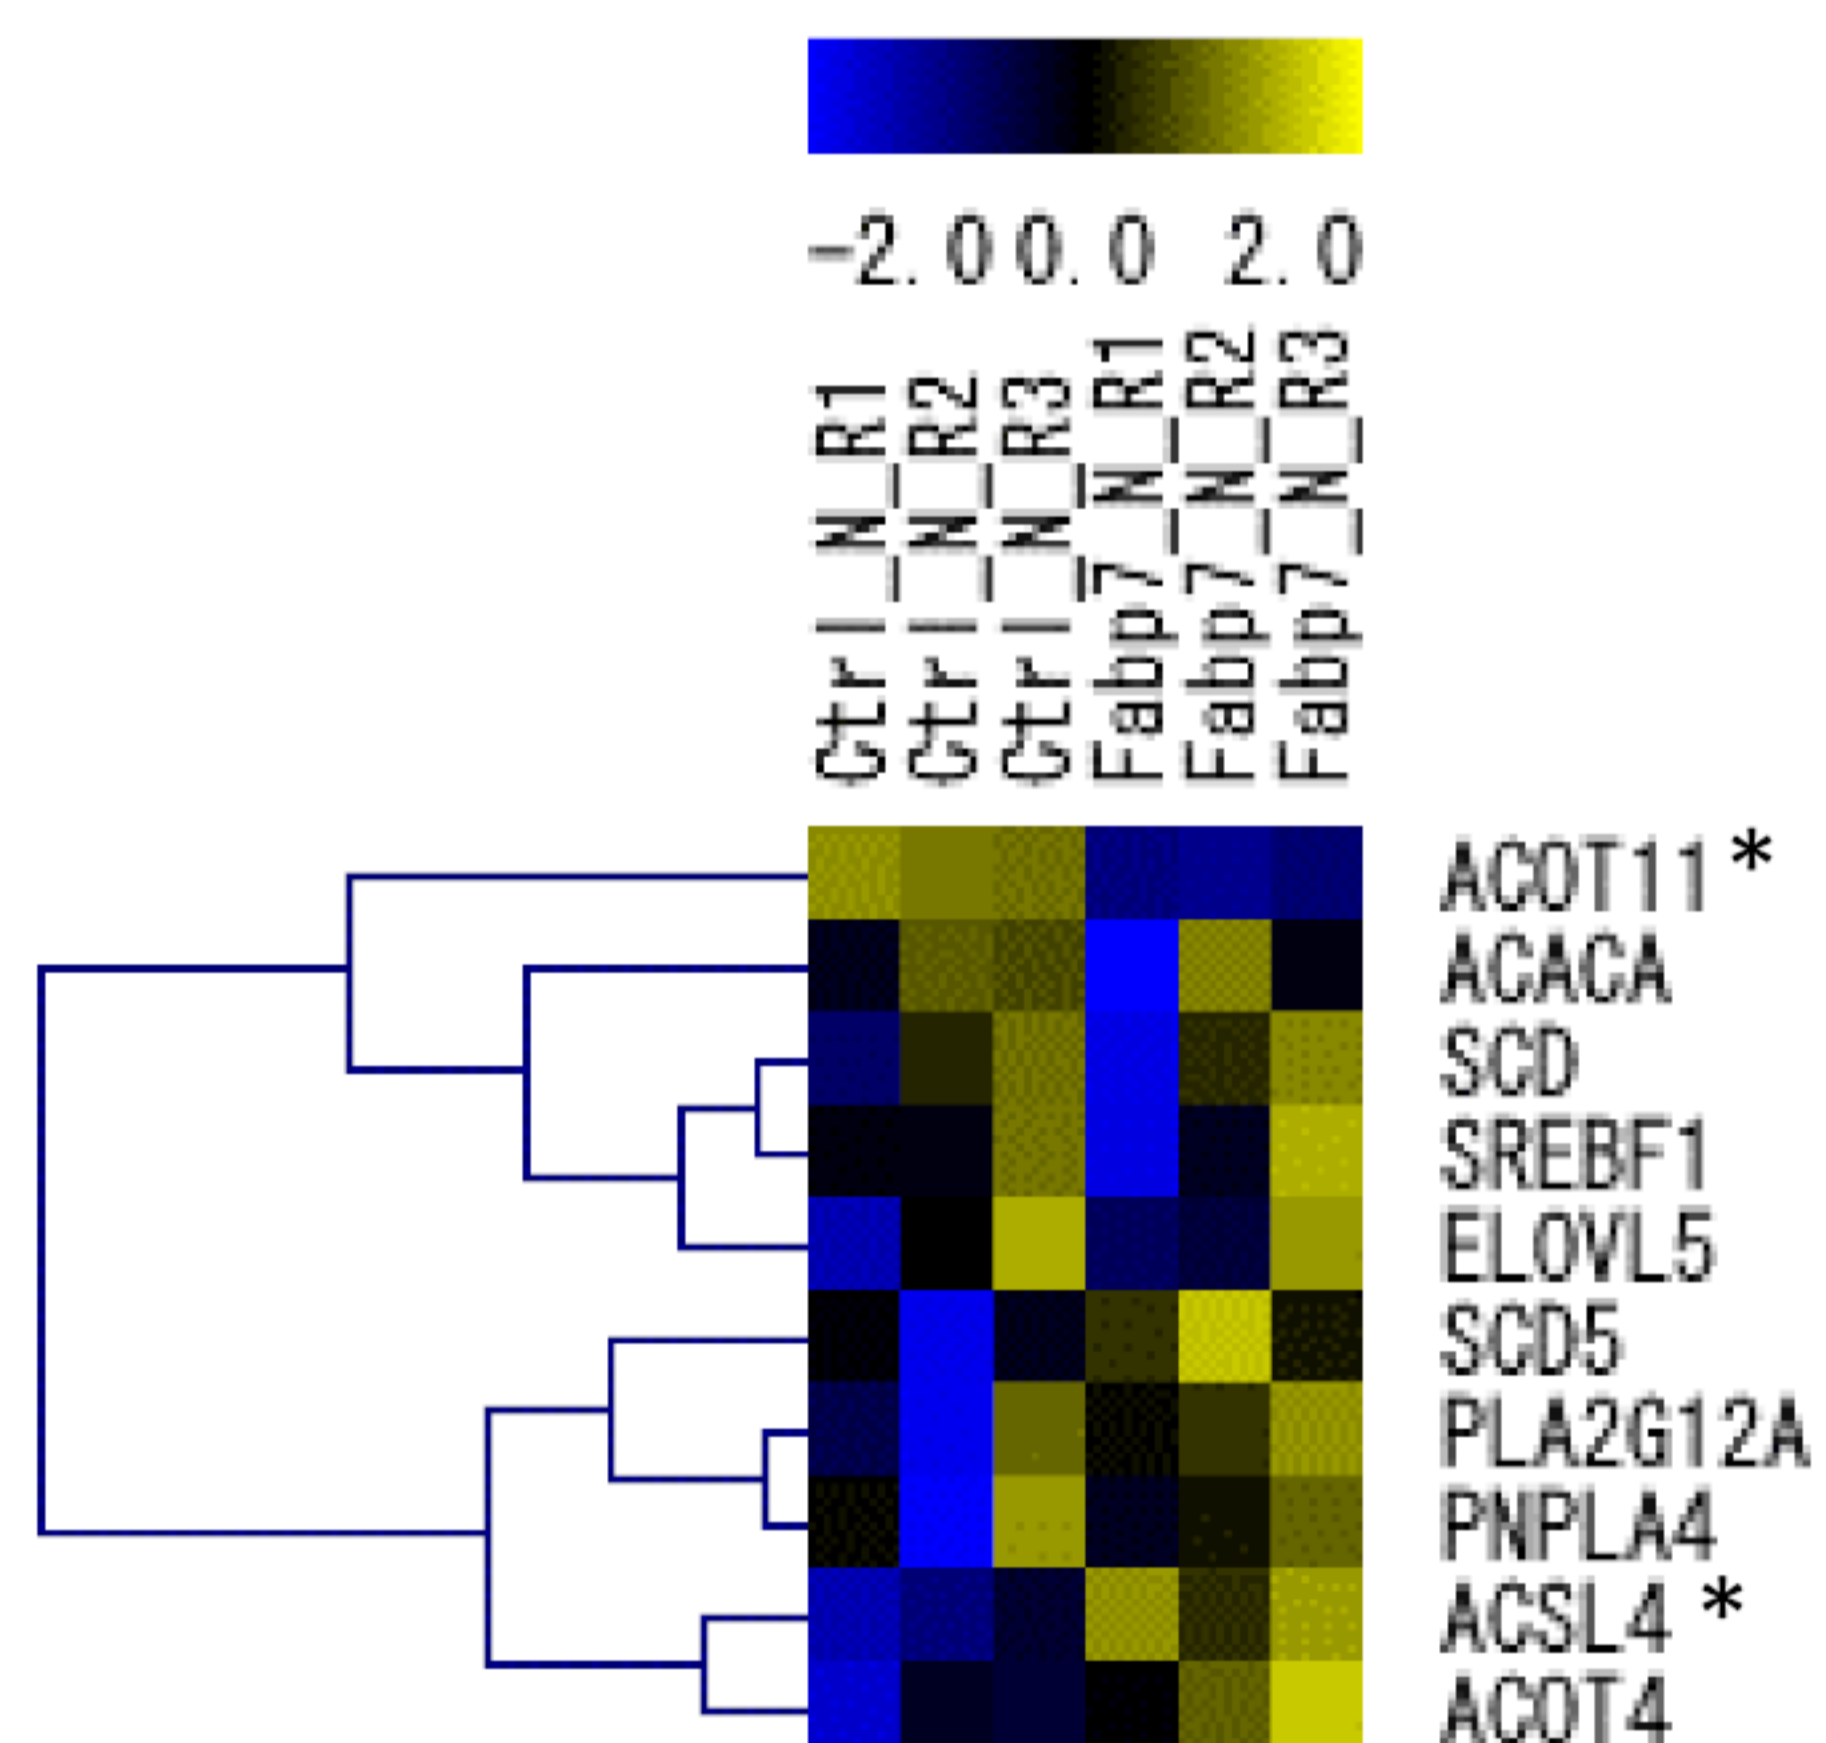

**a.** the difference of FA composition in culture media. The media without cells (black), the media of control cells (gray) and the media of FABP7 knockdown cells (white) were shown. \* indicates a statistically significant difference in the comparison Two-way ANOVA with Sidak's post hoc multiple comparisons test. \*\* $p < 0.01$ ; \*\*\* $p < 0.001$ . **b.** a heat map illustrating the expression of individual genes related to "Unsaturated fatty acid synthesis and transport". Gene expression values are indicated by a blue to yellow color scale (top bar). The analysis was performed in biological triplicate. \* indicates a statistically significant difference.
